# Supplementary material for: Catalyst-assisted synthesis and growth mechanism of ultra-long single crystal α-Si3N4 nanobelts with strong violet–blue luminescent properties
Source: Royal Society of Chemistry journal article supplement (doi:10.1039/c2ce26010g), 2012-01-01
Supplement: c2ce26010g.pdf [file c2ce26010g.pdf]

## Electronic Supplementary Information

### Catalyst-assisted synthesis and growth mechanism of ultra-long single crystal $\alpha$ -Si<sub>3</sub>N<sub>4</sub> nanobelts with strong violet-blue luminescent properties

Juntong Huang<sup>a,b</sup> Shaowei Zhang,<sup>\*b,c</sup> Zhaohui Huang,<sup>\*a</sup> Yan Wen,<sup>b,c</sup> Minghao Fang<sup>a</sup> and Yangai Liu<sup>a</sup>

<sup>a</sup> School of Materials Science and Technology, China University of Geosciences (Beijing), Beijing 100083, P. R. China.

<sup>b</sup> Department of Materials Science and Engineering, University of Sheffield, Sheffield S1 3JD, UK.

<sup>c</sup> College of Engineering, Mathematics and Physical Sciences, University of Exeter, Exeter EX4 4QF, UK.

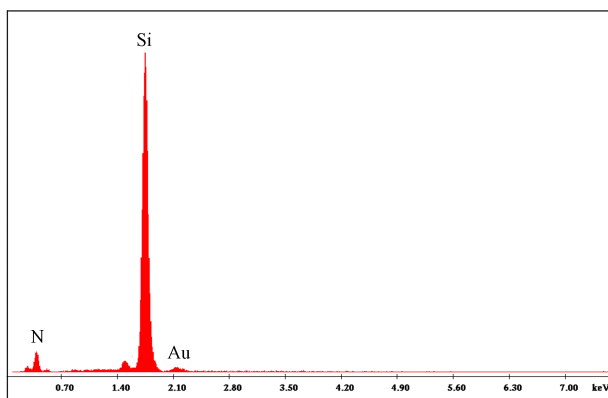

**Fig. S1** EDS pattern of the white-colored product layer on the Ni(NO<sub>3</sub>)<sub>2</sub>-deposited carbon substrate.

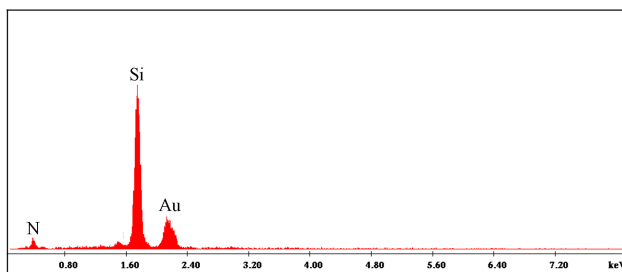

**Fig. S2** EDS pattern detected at the tip of the  $\alpha$ -Si<sub>3</sub>N<sub>4</sub> nanobelts.

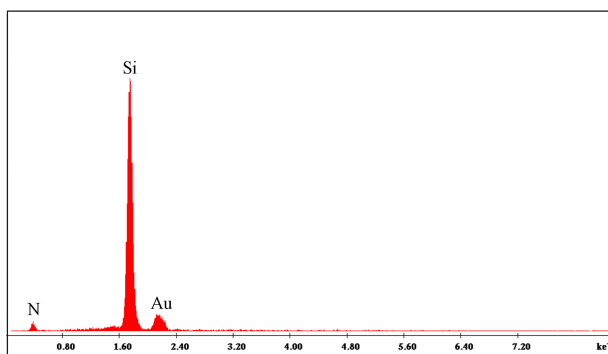

**Fig. S3** EDS pattern of short nanobelts.

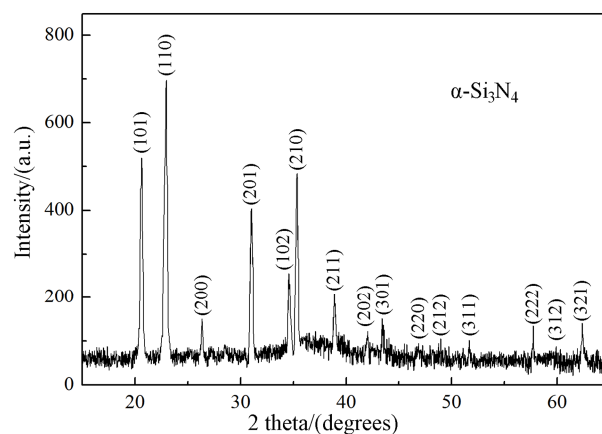

**Fig. S4** XRD pattern of the products formed on the carbon felt deposited without deposition of  $\text{Ni}(\text{NO}_3)_2$ .

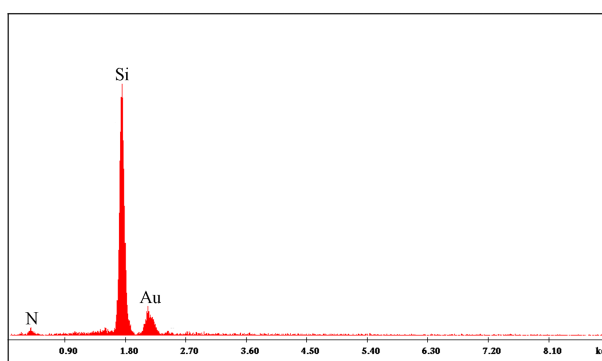

**Fig. S5** EDS pattern of the products formed on the carbon felt deposited without deposition of  $\text{Ni}(\text{NO}_3)_2$ .

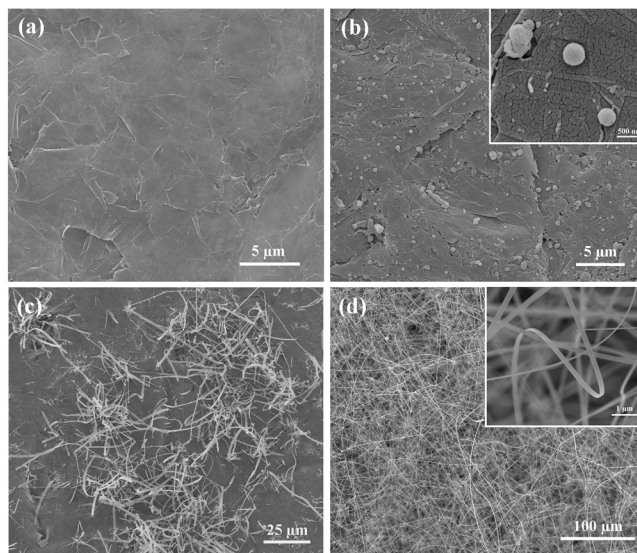

**Fig. S6** SEM images of (a) the original carbon felt without any catalyst; (b) the carbon felt with  $\text{Ni}(\text{NO}_3)_2$  heated at 1450 °C for 5 min; (c) some short nanobelts are initially grown on the carbon substrate at 1450 °C for 0.5 h; (d) a plenty of long nanobelts formed at 1450 °C for 3 h are fully covering the carbon felt substrate.
